# Supplementary material for: TIHI Toolkit: A Peak Finder and Analyzer for Spectroscopic Data
Source: PubMed Central journal article supplement (PMC11656381; doi:10.1021/acsomega.4c06830), 2024-12-06
Supplement: ao4c06830_si_001.pdf [file ao4c06830_si_001.pdf]

# TIHI Toolkit: A Peak Finder and Analyser for Spectroscopic Data

Kyunghoon Han<sup>a,\*</sup>, Ariadni Boziki<sup>a</sup>, Alexandre Tkatchenko<sup>a</sup>, and Joshua T.  
Berryman<sup>a</sup>

<sup>a</sup>*Department of Physics and Materials Science, University of Luxembourg, L-1511,  
Luxembourg City, Luxembourg.*

E-mail: [kyunghoon.han@proton.me](mailto:kyunghoon.han@proton.me)

Table S1: Performance comparison between *Tihi*, Spectragryph<sup>1</sup> and OriginPro<sup>2</sup> for the XRD spectrum of anatase.<sup>3,4</sup> This table lists the experimental angles of incidence ( $\theta$ ), the angles detected by each tool, their absolute differences, and the percentage error relative to the experimental data. Missing data is indicated by asterisks (\*). Abbreviations: Exp. for experimental, SG for Spectragryph.

| Exp. Data      | Tihi Results | Tihi Errors  | SG Results   | SG Errors    | Origin Results | Origin Errors |
|----------------|--------------|--------------|--------------|--------------|----------------|---------------|
| 25.23          | 25.24        | 0.01 (0.04%) | 25.22        | 0.01 (0.04%) | 24.08          | 1.15 (4.56%)  |
| 36.86          | 36.80        | 0.06 (0.16%) | 36.83        | 0.03 (0.08%) | 36.22          | 0.64 (1.74%)  |
| 37.72          | 37.66        | 0.06 (0.16%) | 37.69        | 0.03 (0.08%) | 37.96          | 0.24 (0.64%)  |
| 38.46          | 38.43        | 0.03 (0.08%) | 38.43        | 0.04 (0.10%) | *              | *             |
| 47.89          | 47.86        | 0.03 (0.06%) | 47.85        | 0.04 (0.08%) | 48.37          | 0.52 (1.09%)  |
| 53.77          | 53.70        | 0.07 (0.13%) | 53.72        | 0.05 (0.09%) | 53.57          | 0.20 (0.37%)  |
| 54.89          | 54.87        | 0.02 (0.04%) | 54.85        | 0.05 (0.09%) | 55.31          | 0.42 (0.77%)  |
| 61.92          | 62.02        | 0.10 (0.16%) | 61.87        | 0.05 (0.08%) | 60.51          | 1.41 (2.28%)  |
| 62.51          | 62.57        | 0.06 (0.10%) | 62.46        | 0.06 (0.10%) | 62.24          | 0.27 (0.43%)  |
| 68.59          | 68.59        | 0.00 (0.00%) | 68.53        | 0.06 (0.09%) | *              | *             |
| 70.05          | 70.24        | 0.19 (0.27%) | 69.99        | 0.06 (0.09%) | 70.91          | 0.86 (1.23%)  |
| 74.83          | 74.85        | 0.02 (0.03%) | 74.76        | 0.07 (0.09%) | 74.39          | 0.44 (0.59%)  |
| 75.78          | 75.54        | 0.24 (0.32%) | 75.70        | 0.08 (0.11%) | 76.12          | 0.34 (0.45%)  |
| 82.41          | 82.28        | 0.13 (0.16%) | 82.33        | 0.08 (0.10%) | 81.32          | 1.09 (1.32%)  |
| 82.87          | 82.52        | 0.35 (0.42%) | *            | *            | 83.06          | 0.19 (0.23%)  |
| Average Errors |              | 0.09 (0.14%) | 0.05 (0.09%) |              | 0.60 (1.21%)   |               |

Table S2: Performance comparison between *Tihi*, Spectragryph<sup>1</sup> and OriginPro<sup>2</sup> for the UV-Vis absorption spectrum of the petal tip of *Puya alpestris*<sup>5</sup> flower. This table presents the peaks identified by Mizuno *et al.*,<sup>5</sup> alongside the peaks detected by *Tihi*, Spectragryph and OriginPro, including their absolute differences and percentage errors relative to the experimental data. Missing data are indicated by asterisks (\*). Abbreviations used: Exp. for experimental, SG for Spectragryph.

| Exp. Data      | Tihi Results | Tihi Errors | SG Results | SG Errors | Origin Results | Origin Errors |
|----------------|--------------|-------------|------------|-----------|----------------|---------------|
| 575            | 576          | 1 (0.17%)   | *          | *         | 535            | 40 (6.96%)    |
| 614            | 615          | 1 (0.16%)   | 610        | 4 (0.65%) | 612            | 2 (0.33%)     |
| 679            | 675          | 4 (0.59%)   | *          | *         | 688            | 9 (1.33%)     |
| Average Errors |              | 2 (0.31%)   | 4 (0.65%)  |           | 17 (2.87%)     |               |

---

## References

- (1) Spectragryph: optical spectroscopy software. <https://www.effemm2.de/spectragryph/>, version v1.2.16.1, 2022; Accessed on June 3rd, 2024.
- (2) Origin(Pro): OriginLab Corporation. <https://www.originlab.com/>, version 2022; Accessed on June 3rd, 2024.
- (3) Lafuente, B.; T., D. R.; Yang, H.; Stone, N. In *The power of databases: the RRUFF project.*; Armbruster, T., Danisi, R. M., Eds.; W. De Gruyter, 2015; pp 1–30.
- (4) Horn, M. S. C. F.; Schwebdtfeger, C. F.; Meagher, E. P. Refinement of the structure of anatase at several temperatures. *Z. Kristallogr. Cryst. Mater.* **1972**, *136*, 273–281.
- (5) Mizuno, T.; Sugahara, K.; Tsutsumi, C.; Iino, M.; Koi, S.; Noda, N.; Iwashina, T. Identification of anthocyanin and other flavonoids from the green–blue petals of *Puya alpestris* (Bromeliaceae) and a clarification of their coloration mechanism. *Phytochemistry* **2021**, *181*, 112581.
